# Supplementary material
Source: Springer Nature journal article supplement (https://www.springermedizin.de/resource/supplementary/12876_2006_185_MOESM4_ESM.pdf/9438876)

## A. Liver cancer

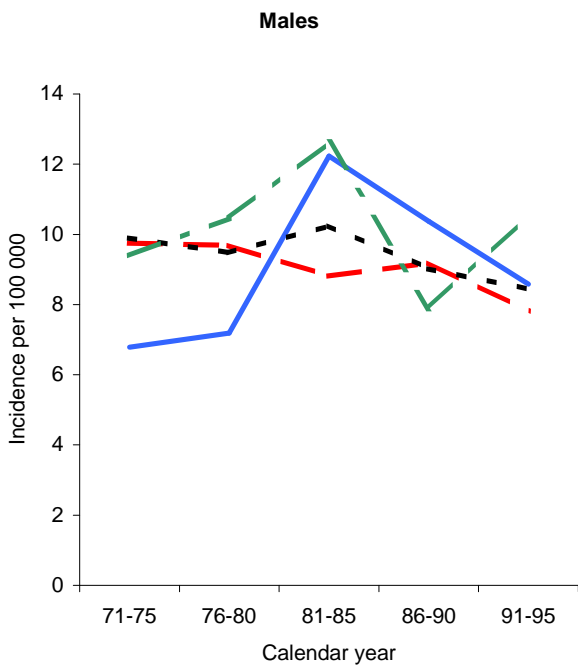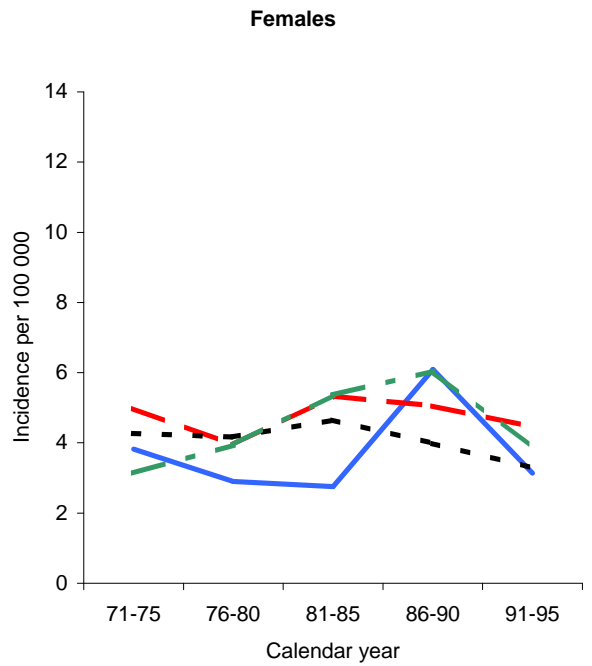

## B. Gall bladder and biliary tract cancer

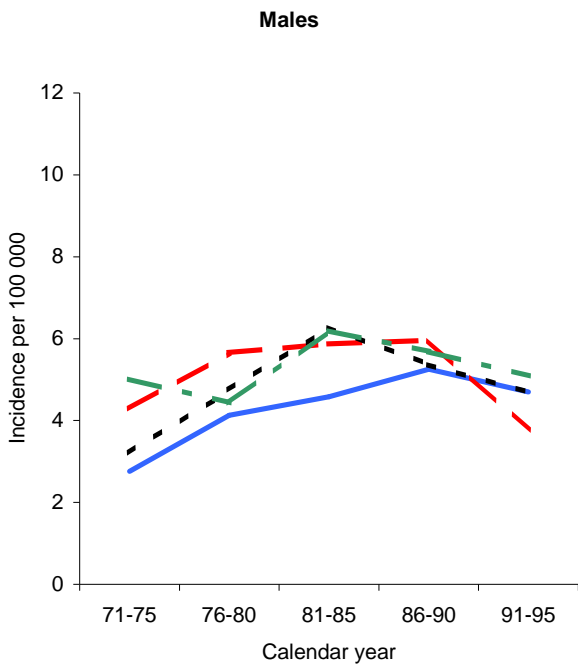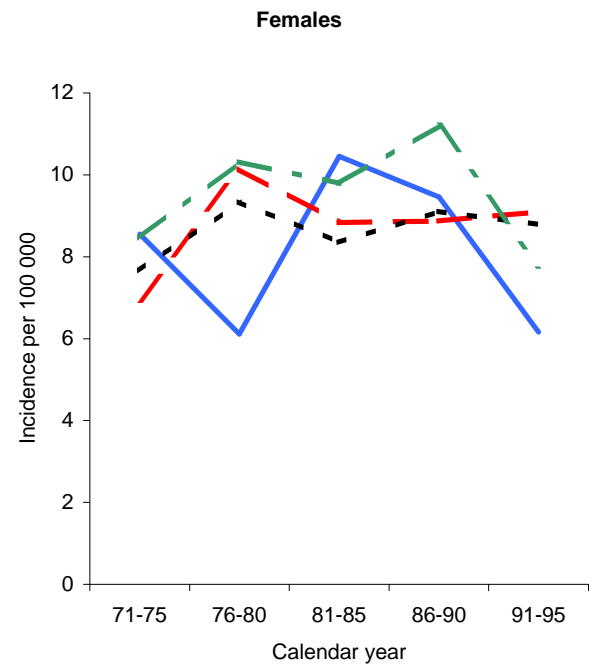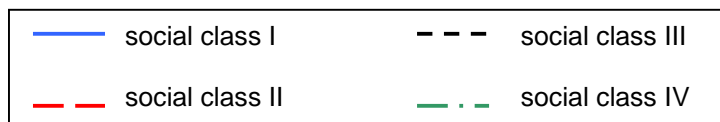

Supplement: MOESM4 [file 9438876]
